# Supplementary material for: Patient activation in adults attending appointments in general practice: a cross-sectional study
Source: Springer Nature journal article supplement (doi:10.1186/s12875-023-02102-9), 2023-07-10
Supplement: MOESM1 [file 25599050]

**Patient activation in adults attending scheduled appointments in general practice: a cross-sectional study.**

Hernar, Graue, Igland, Richards, Riise, Haugstvedt & Kolltveit (2023) BMC Primary Care. <https://doi.org/10.1186/s12875-023-02102-9>

**Supplementary table 1.** Quality of life and satisfaction with health scores by patient activation levels among adult patients.

|                                                      | Quality of Life score* |           |          | Satisfaction with Health score† |           |          |
|------------------------------------------------------|------------------------|-----------|----------|---------------------------------|-----------|----------|
|                                                      | N= 1,159               | Mean ± SD | <i>p</i> | N= 1,158                        | Mean ± SD | <i>p</i> |
| Patient Activation Measure (PAM-13) levels           |                        |           | <.001    |                                 |           | <.001    |
| Level 1 - Disengaged and overwhelmed                 | n= 67                  | 3.4 ± .9  |          | n= 67                           | 2.9 ± 1.1 |          |
| Level 2 - Becoming aware, but still struggling       | n= 74                  | 3.6 ± .8  |          | n= 74                           | 3.2 ± .8  |          |
| Level 3 - Taking action and gaining control          | n= 611                 | 3.8 ± .8  |          | n= 609                          | 3.4 ± .9  |          |
| Level 4 - Maintaining behaviours and pushing further | n= 407                 | 4.1 ± .7  |          | n= 408                          | 3.8 ± .8  |          |

\* Scored from 1-5; 1 = very poor, 2 = poor, 3 = neither poor nor good, 4 = good, 5 = very good.

† Scored from 1-5; 1 = very dissatisfied, 2 = dissatisfied, 3 = neither dissatisfied nor satisfied, 4 = satisfied, 5 = very satisfied.
